# Supplementary material for: 16S rRNA seq-identified Corynebacterium promotes pyroptosis to aggravate diabetic foot ulcer
Source: Springer Nature journal article supplement (doi:10.1186/s12879-024-09235-x), 2024-04-01

Figure6B NLRP3

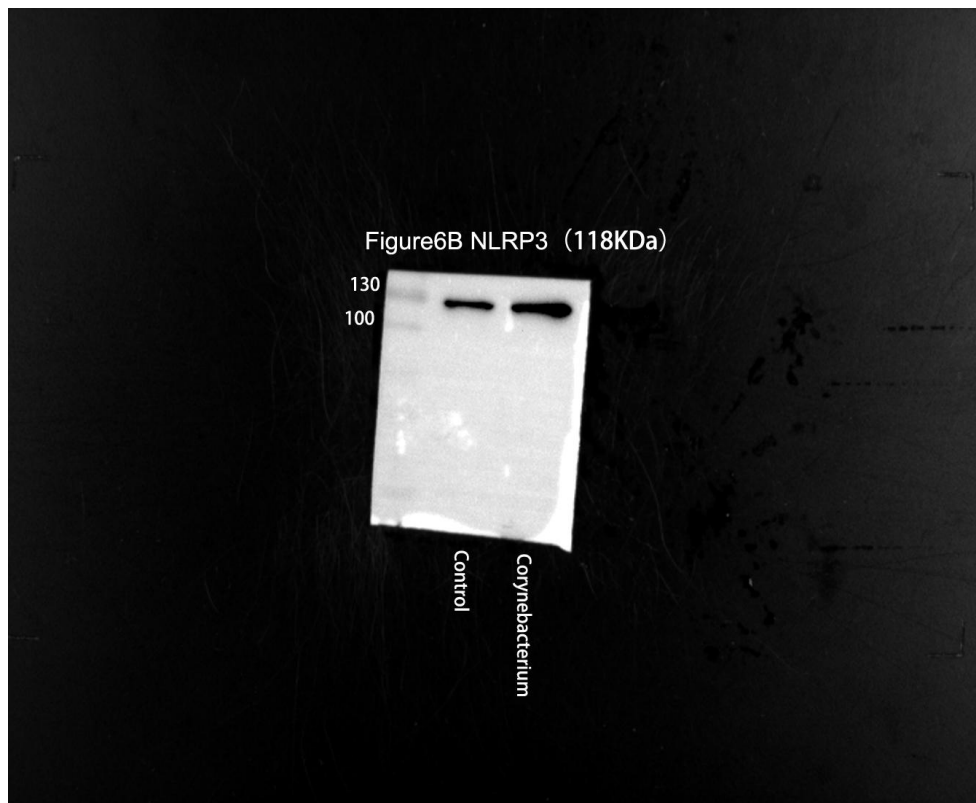

Figure6B GSDMD

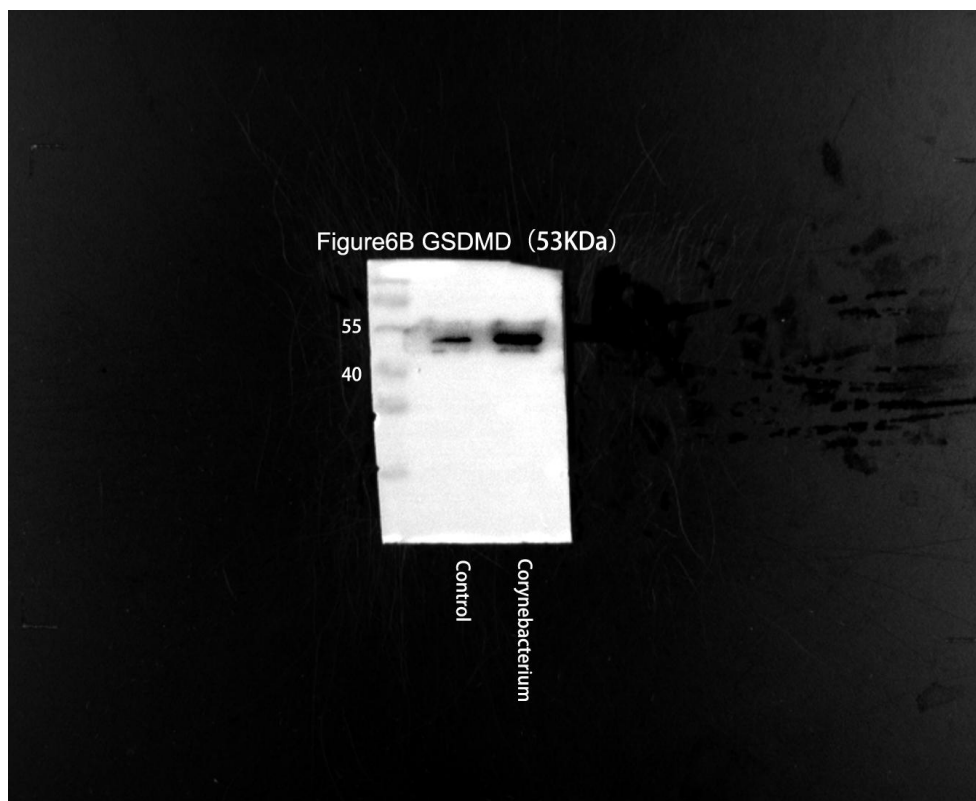

Figure6B Caspase-3

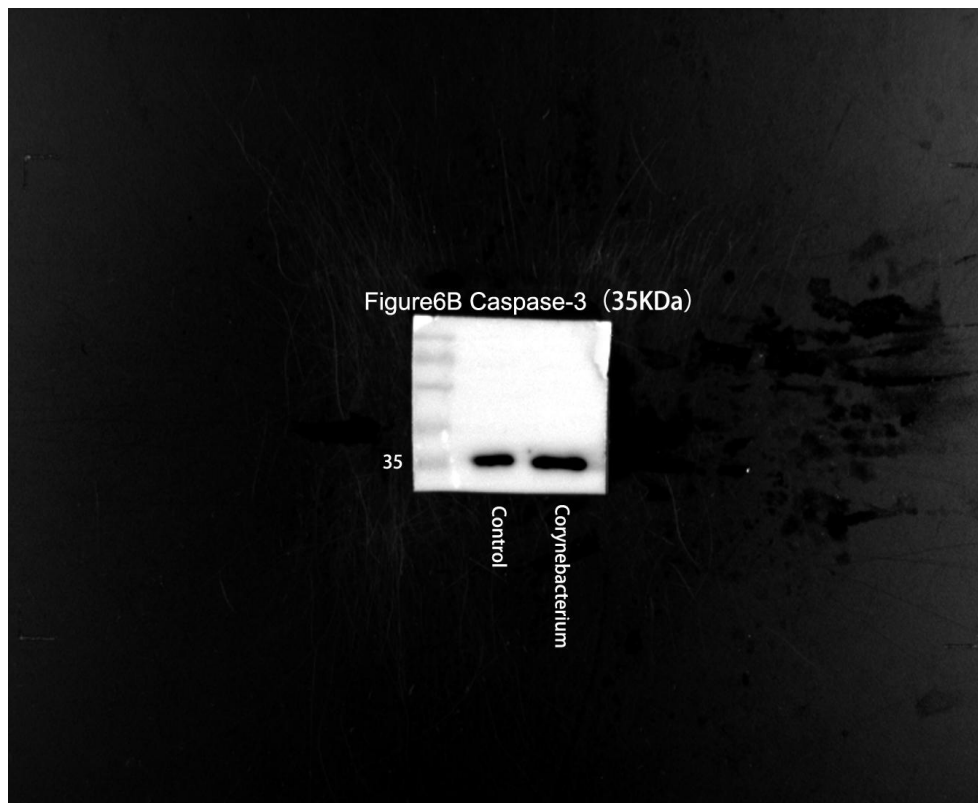

Figure6B GAPDH

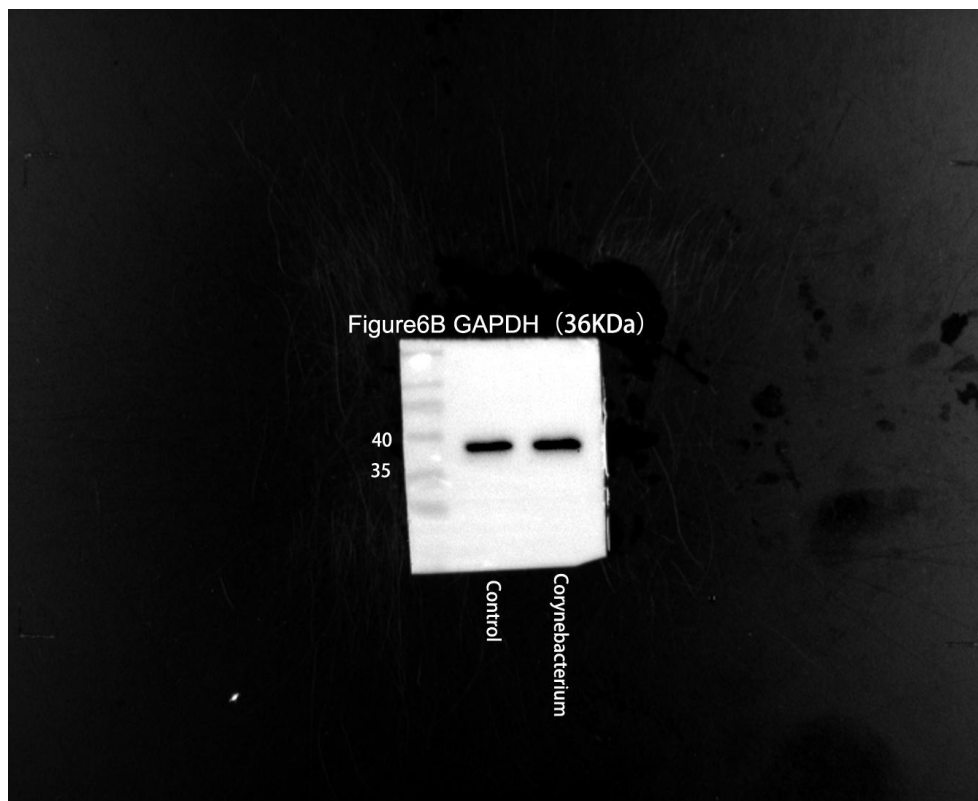

Supplement: MOESM2 [file 26928090]
